# Supplementary material for: Green synthesis and characterization of gold nanoparticles embedded into magnetic carbon nanocages and their highly efficient degradation of methylene blue
Source: Royal Society of Chemistry journal article supplement (doi:10.1039/c6ra00537c), 2016-01-01
Supplement: c6ra00537c1.pdf [file c6ra00537c1.pdf]

# **Green Synthesis and Characterization of Gold Nanoparticles Embedded into Magnetic Carbon Nanocages and Their High Efficient Degradation for Methylene Blue**

**Wei Zuo<sup>a</sup>, Gaosong Chen<sup>a</sup>, Fengjuan Chen<sup>a</sup>, Siliang Li<sup>b, \*</sup>, Baodui Wang<sup>a</sup>,**

*<sup>a</sup>Key Laboratory of Nonferrous Metal Chemistry and Resources Utilization of Gansu Province, State Key Laboratory of Applied Organic Chemistry, and Key Laboratory of Special Function Materials and Structure Design, Ministry of Education, Lanzhou University Gansu, Lanzhou, 730000 (P.R. China).*

*<sup>b</sup>School of Petrochemical Engineering, Lanzhou University of Technology, Lanzhou 730050, P. R. China*

*Corresponding author. Fax: (+ 86)931-8912582;*

*E-mail: wangbd@lzu.edu.cn*

## Supplementary data

**Fig. S1** IR spectra of (1) the CNSs, (2) the CNSs-DETA, (3) the CNSs-DETA-DIB, (4) the Fe<sub>3</sub>O<sub>4</sub> NPs/CNSs, (5) the Au NPs/MCNSs, respectively.

**Fig. S2** (A) XPS spectra of the Fe<sub>3</sub>O<sub>4</sub> NPs/CNSs (a-1) and the Au NPs/MCNSs (a-2) in the N1s region. (B) XPS spectra of the Fe<sub>3</sub>O<sub>4</sub> NPs/CNSs (b-1) and the Au NPs/MCNSs (b-2) in the O1s region.

**Fig. S3** UV-vis spectral changes of MB (50 μM) aqueous solution with NaBH<sub>4</sub> (8 μM) in the absence of the Au NPs/MCNSs catalyst at 1 min intervals in 12 minutes.

**Fig. S4** UV-vis spectral changes of MB (40 μM) aqueous solution with NaBH<sub>4</sub> (6 μM) in the presence of the Fe<sub>3</sub>O<sub>4</sub> NPs/CNSs at 1 min intervals in 12 minutes.

**Fig. S5** UV-vis spectral changes of R6G (A), RB (B) and MO (C) aqueous solution with NaBH<sub>4</sub> (6 μM) at 1 min intervals. (D) The degradation efficiency of R6G, RB and MO.

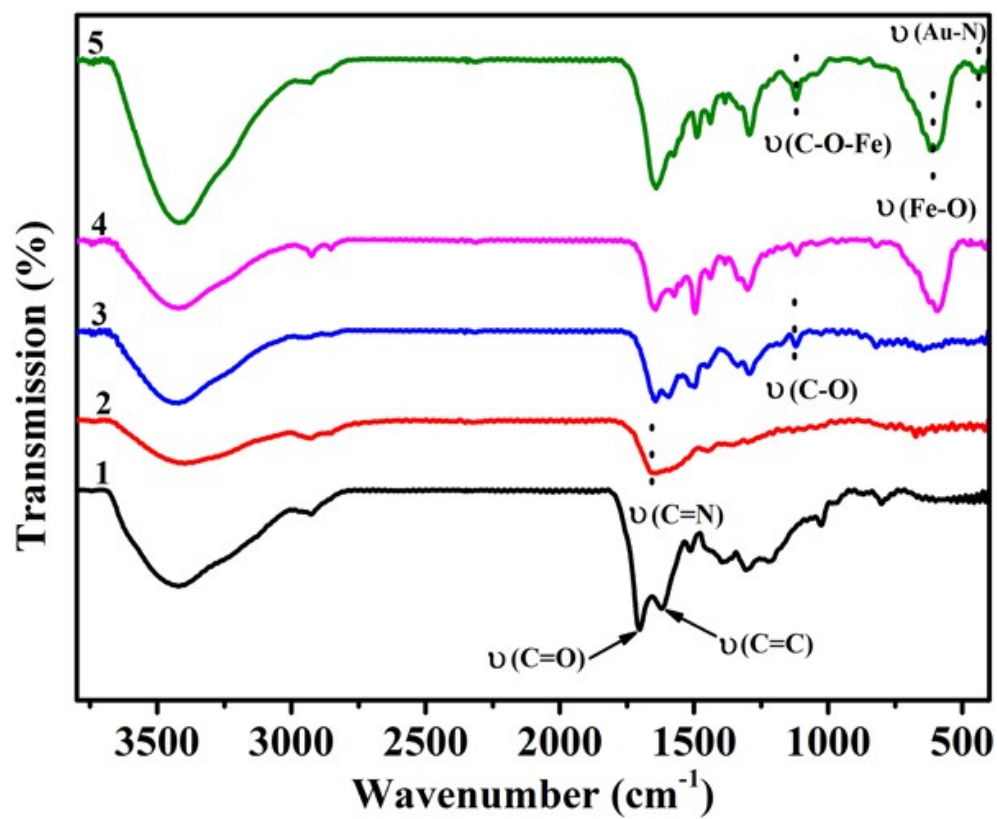

**Fig. S1** IR spectra of (1) the CNSs, (2) the CNSs-DETA, (3) the CNSs-DETA-DIB, (4) the Fe<sub>3</sub>O<sub>4</sub> NPs/CNSs, (5) the Au NPs/MCNSs, respectively.

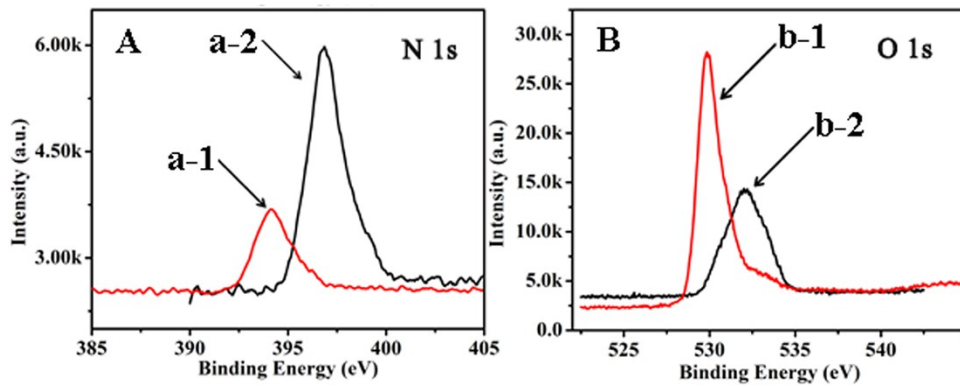

**Fig. S2** (A) XPS spectra of the  $\text{Fe}_3\text{O}_4$  NPs/CNSs (a-1) and the Au NPs/MCNSs (a-2) in the N1s region. (B) XPS spectra of the  $\text{Fe}_3\text{O}_4$  NPs/CNSs (b-1) and the Au NPs/MCNSs (b-2) in the O1s region.

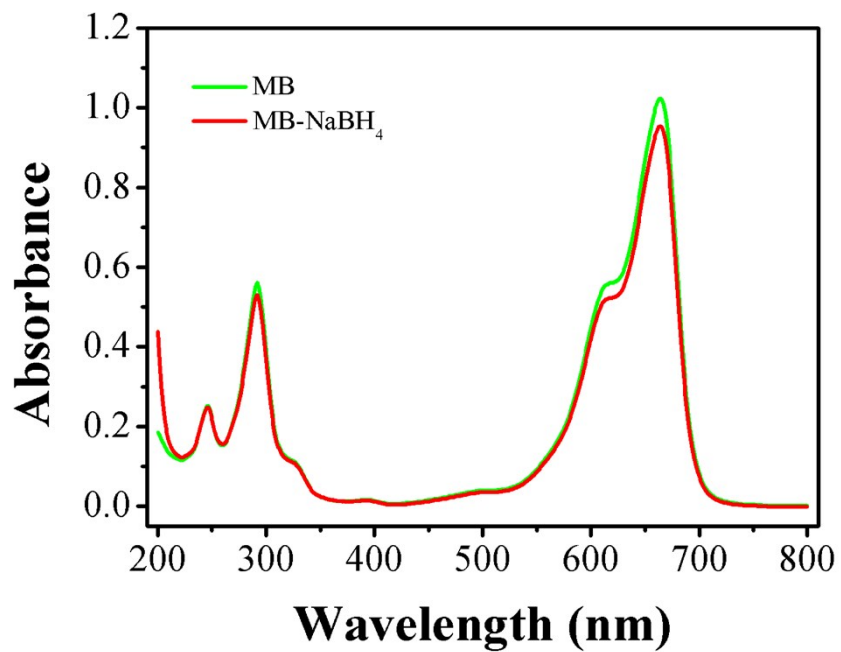

**Fig. S3** UV-vis spectral changes of MB (50 μM) aqueous solution with NaBH<sub>4</sub> (8 μM) in the absence of the Au NPs/MCNSs catalyst at 1 min intervals in 12 minutes.

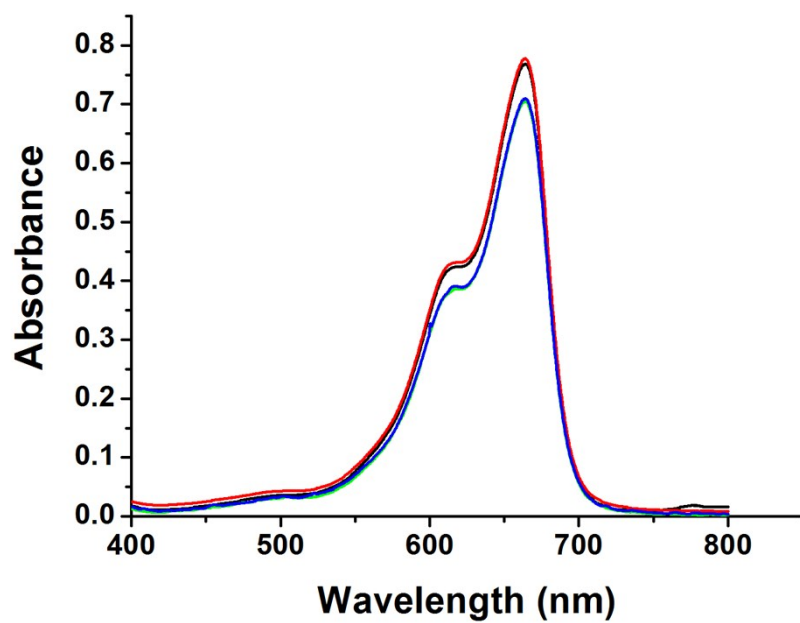

**Fig. S4** UV-vis spectral changes of MB (40  $\mu\text{M}$ ) aqueous solution with  $\text{NaBH}_4$  (6  $\mu\text{M}$ ) in the presence of the  $\text{Fe}_3\text{O}_4$  NPs/CNSs at 1 min intervals in 12 minutes.

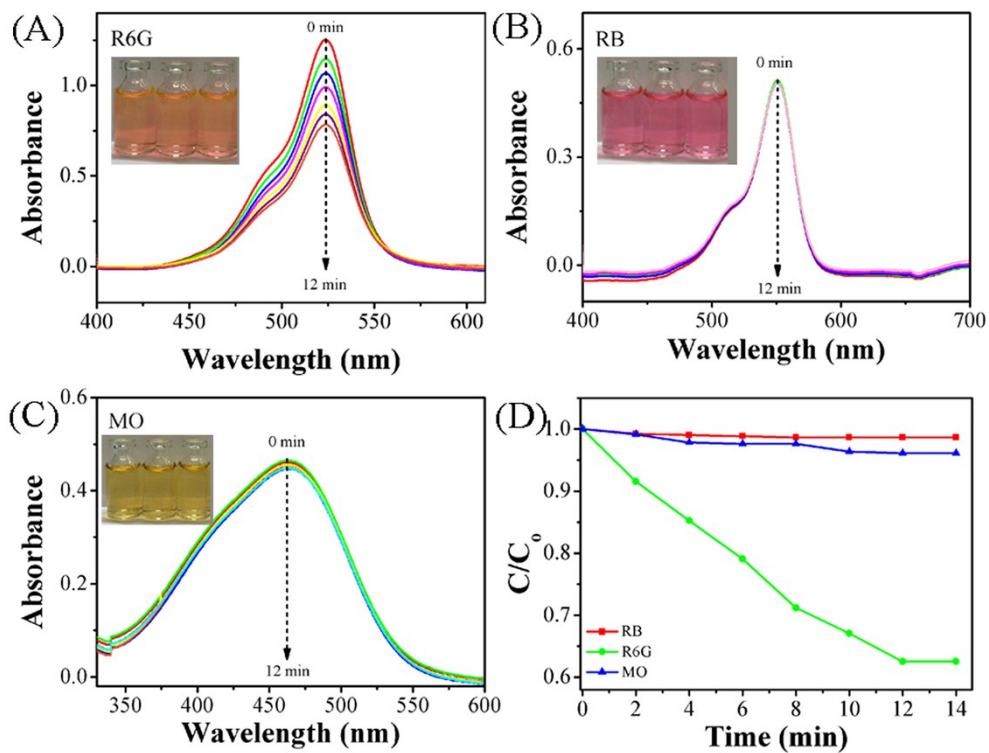

**Fig. S5** UV-vis spectral changes of R6G (A), RB (B) and MO (C) aqueous solution with  $\text{NaBH}_4$  (6  $\mu\text{M}$ ) at 1 min intervals. (D) The degradation efficiency of R6G, RB and MO.
